# Supplementary material for: Hendra Virus Outbreak with Novel Clinical Features, Australia
Source: PubMed Central journal article supplement (PMC2958006; doi:10.3201/eid1602.090780), 2010-02
Supplement: 09-0780_appT-s1.pdf [file 09-0780_appT-s1.pdf]

Appendix Table. Location by date of confirmed case-patients with Hendra virus infection residing at an equine referral veterinary practice in Brisbane, Australia, 2008\*

| Date | Stall/yard name/no. |                |                |                 |                |
|------|---------------------|----------------|----------------|-----------------|----------------|
|      | Case-patient 1†     | Case-patient 2 | Case-patient 3 | Case-patient 4‡ | Case-patient 5 |
| June |                     |                |                |                 |                |
| 10   | GK                  |                |                | 6               |                |
| 11   | GK                  |                |                | 6               |                |
| 12   | GK                  |                | 40             | 6               |                |
| 13   | GK                  |                | 40             | 3               |                |
| 14   | GK                  |                | 40             | 3               |                |
| 15   | GK                  |                | 40             | 3               |                |
| 16   | 19                  |                | 16             | 3               |                |
| 17   | 19                  | 2              | 16             | 1               |                |
| 18   | 19                  | 2              | 16             | 1               |                |
| 19   | 19                  | 2              | 16             | 1               |                |
| 20   | 19                  | 2              | 17             | 1               |                |
| 21   | 19                  | 2              | 17             | 1               |                |
| 22   | 19                  | 2              | 17             | 1               |                |
| 23   | 19                  | 2              | 17             | 1               |                |
| 24   | 19                  | 2              | 17             | 1               | 5              |
| 25   | 19                  | 2              | 17             | 4               | 5              |
| 26   | <b>19</b>           | 2              | 17             | 4               | 5              |
| 27   |                     | 2              | 17             | 4               | 5              |
| 28   |                     | 2              | 17             | 4               | 5              |
| 29   |                     | 2              | 17             | 4               | 5              |
| 30   |                     | <b>2</b>       | 17             | 4               | 5              |
| July |                     |                |                |                 |                |
| 1    |                     | <b>2</b>       | 17             | 4               | 5              |
| 2    |                     | <b>2</b>       | 17             | 4               | 5              |
| 3    |                     | <b>2</b>       | 17             | 4               | 5              |
| 4    |                     | 2              | <b>26</b>      | 4               | 5              |
| 5    |                     | 2              | <b>3</b>       | 4               | 5              |
| 6    |                     | 2              |                | 4               | 5              |
| 7    |                     | 2              |                | <b>4</b>        | 5              |
| 8    |                     | 2              |                | <b>4</b>        | RR 2           |
| 9    |                     | 2              |                |                 | RR 2           |
| 10   |                     | 2              |                |                 | RR 2           |
| 11   |                     | 2              |                |                 | RR 2           |
| 12   |                     | 2              |                |                 | 3              |
| 13   |                     | 2              |                |                 | 3              |
| 14   |                     | 2              |                |                 | 3              |
| 15   |                     | 2              |                |                 | 3              |
| 16   |                     | 2              |                |                 | 3              |
| 17   |                     | 2              |                |                 | 3              |
| 18   |                     | 24             |                |                 | 3              |
| 19   |                     | 24             |                |                 | 3              |
| 20   |                     | 24             |                |                 | 3              |
| 21   |                     | 24             |                |                 | 3              |
| 22   |                     | 24             |                |                 | 3              |
| 23   |                     | 24             |                |                 | 3              |
| 24   |                     | 24§            |                |                 | <b>3</b>       |

\*RR, recovery room. **Boldface** indicates dates on which clinical signs were observed.

†Long-term resident admitted on June 27, 2007.

‡Admitted on May 15, 2008.

§Remained in stall 24 after recovering until he was subsequently euthanized and a necropsy was performed on August 15, 2008.
